# Supplementary material for: Gentianella lutescens subsp. carpatica J. Holub.: Shoot Propagation In Vitro and Effect of Sucrose and Elicitors on Xanthones Production
Source: MDPI journal article supplement (doi:10.3390/plants10081651), 2021-08-11
Supplement: s1 [file s1]

**Table S1.** The results of nested ANOVA for the effects of increasing sucrose and sorbitol concentrations on the growth parameters (growth index, fresh and dry weight and % of dry matter) of shoot cultures of *G. lutescens* line 5. The bold values indicate statistically significant differences ( $p \leq 0.05$ ).

| <b>ANOVA source of variation</b> | <b>Df</b> | <b>Mean Square</b> | <b>F- Ratio</b> | <b>p-Value</b>  |
|----------------------------------|-----------|--------------------|-----------------|-----------------|
| <b>Sucrose</b>                   |           |                    |                 |                 |
| Fresh weight                     | 4         | 1285421            | 54.517          | <b>0.000000</b> |
| Dry weight                       | 4         | 2999               | 2.660           | <b>0.044738</b> |
| Growth index                     | 4         | 8.2287             | 54.831          | <b>0.000000</b> |
| Dry matter %                     | 4         | 0.05191            | 146.71          | <b>0.000000</b> |
| Flowering                        | 4         | 4.12000            | 4.54412         | <b>0.003617</b> |
| <b>Sorbitol</b>                  |           |                    |                 |                 |
| Fresh weight                     | 4         | 729024             | 18.993          | <b>0.000000</b> |
| Dry weight                       | 4         | 1723               | 1.030           | 0.405723        |
| Growth index                     | 4         | 4.8599             | 18.8620         | <b>0.000000</b> |
| Dry matter %                     | 4         | 0.027910           | 94.12           | <b>0.000000</b> |
