# Supplementary material for: Gentianella lutescens subsp. carpatica J. Holub.: Shoot Propagation In Vitro and Effect of Sucrose and Elicitors on Xanthones Production
Source: MDPI journal article supplement (doi:10.3390/plants10081651), 2021-08-11
Supplement: s1 [file s1]

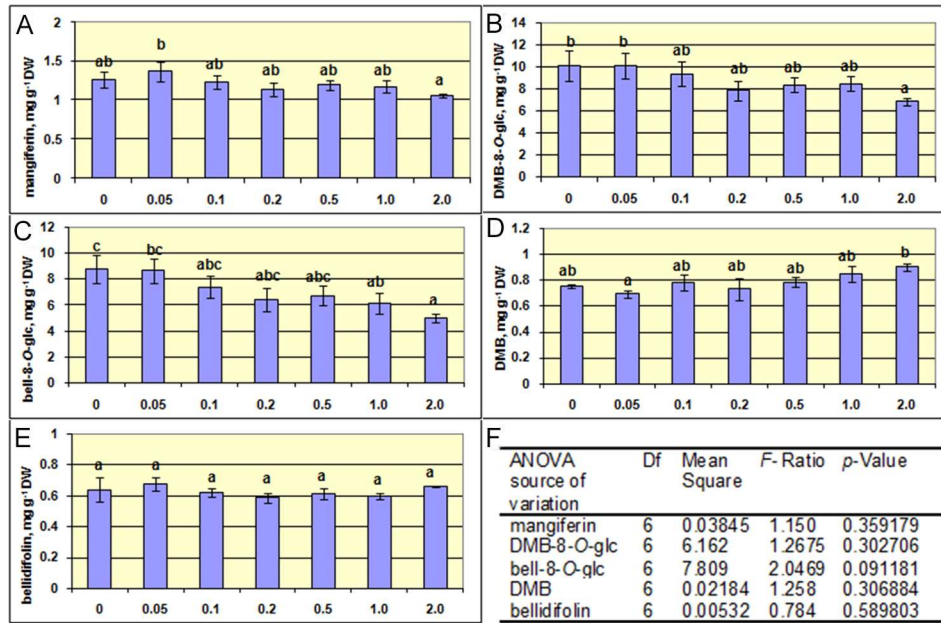

**Figure S1.** The effect of increasing concentrations of BA (0–2 mg L<sup>-1</sup>) on the content of xanthenes mangiferin (A), demethylbellidifolin-8-O-glucoside (DMB-8-O-glc) (B), bellidifolin-8-O-glucoside (bell-8-O-glc) (C), demethylbellidifolin (DMB) (D), and bellidifolin (E) in shoots cultures of *G. lutescens* line 5 after 35 days of cultivation. Values are the means  $\pm$  SE of six biological replicates ( $n = 6$ ). Data were analysed by one-way ANOVA (F). Values followed by different letters are significantly different according to Fisher's LSD test at  $p \leq 0.05$ .
