# Supplementary material for: Gentianella lutescens subsp. carpatica J. Holub.: Shoot Propagation In Vitro and Effect of Sucrose and Elicitors on Xanthones Production
Source: MDPI journal article supplement (doi:10.3390/plants10081651), 2021-08-11
Supplement: s1 [file s1]

**Table S3.** The results of nested ANOVA for the effects of increasing sucrose and sorbitol concentrations on the xanthones production in shoot cultures of *G. lutescens* line 5. The bold values indicate statistically significant differences ( $p \leq 0.05$ ).

| <b>ANOVA source of variation</b> | <b>Df</b> | <b>Mean Square</b> | <b>F- Ratio</b> | <b>p-Value</b>  |
|----------------------------------|-----------|--------------------|-----------------|-----------------|
| <b>Sucrose</b>                   |           |                    |                 |                 |
| mangiferin                       | 4         | 10.5482            | 63.508          | <b>0.000000</b> |
| DMB-8- <i>O</i> -glc             | 4         | 678.94             | 48.610          | <b>0.000000</b> |
| bellidifolin-8- <i>O</i> -glc    | 4         | 102.753            | 28.460          | <b>0.000000</b> |
| DMB                              | 4         | 1.01244            | 9.2811          | <b>0.000039</b> |
| bellidifolin                     | 4         | 0.420090           | 5.5737          | <b>0.001531</b> |
| <b>Sorbitol</b>                  |           |                    |                 |                 |
| mangiferin                       | 4         | 0.14790            | 2.659           | <b>0.049420</b> |
| DMB-8- <i>O</i> -glc             | 4         | 115.669            | 9.9284          | <b>0.000020</b> |
| bellidifolin-8- <i>O</i> -glc    | 4         | 40.408             | 6.6653          | <b>0.000450</b> |
| DMB                              | 4         | 0.076329           | 7.5390          | <b>0.000181</b> |
| bellidifolin                     | 4         | 0.035898           | 2.5989          | 0.053411        |
