# Supplementary material for: Gentianella lutescens subsp. carpatica J. Holub.: Shoot Propagation In Vitro and Effect of Sucrose and Elicitors on Xanthones Production
Source: MDPI journal article supplement (doi:10.3390/plants10081651), 2021-08-11
Supplement: s1 [file s1]

**Table S4.** The results of nested ANOVA for the effects of elicitor type and concentrations on the shoot growth and xanthonenes production in shoot cultures of *G. lutescens* line 5. The bold values indicate statistically significant differences ( $p \leq 0.05$ ).

| Source              | Sum of Squares | df  | Mean Square | F-Ratio | p-Value         |
|---------------------|----------------|-----|-------------|---------|-----------------|
| <b>growth index</b> |                |     |             |         |                 |
| (A) elicitor type   | 2.21915        | 2   | 1.10958     | 11.2014 | <b>0.000041</b> |
| (B) concentration   | 1.84396        | 4   | 0.45541     | 4.5975  | <b>0.001893</b> |
| A x B               | 2.94776        | 8   | 0.36826     | 3.7177  | <b>0.000767</b> |
| Error               | 9.90566        | 100 | 0.09906     |         |                 |
| <b>mangiferin</b>   |                |     |             |         |                 |
| (A) elicitor type   | 1.6776         | 2   | 0.8388      | 11.137  | <b>0.000085</b> |
| (B) concentration   | 6.7056         | 4   | 1.6764      | 22.258  | <b>0.000000</b> |
| A x B               | 1.8488         | 8   | 0.2311      | 3.068   | <b>0.006164</b> |
| Error               | 4.2177         | 56  | 0.0753      |         |                 |
| <b>DMB-8-O-glc</b>  |                |     |             |         |                 |
| (A) elicitor type   | 607.23         | 2   | 303.62      | 24.630  | <b>0.000000</b> |
| (B) concentration   | 1508.37        | 4   | 377.09      | 30.591  | <b>0.000000</b> |
| A x B               | 516.79         | 8   | 64.60       | 5.240   | <b>0.000065</b> |
| Error               | 690.31         | 56  | 12.33       |         |                 |
| <b>bell-8-O-glc</b> |                |     |             |         |                 |
| (A) elicitor type   | 157.53         | 2   | 78.77       | 13.625  | <b>0.000015</b> |
| (B) concentration   | 808.11         | 4   | 202.03      | 34.947  | <b>0.000000</b> |
| A x B               | 149.61         | 8   | 18.70       | 3.235   | <b>0.004287</b> |
| Error               | 323.73         | 56  | 5.78        |         |                 |
| <b>DMB</b>          |                |     |             |         |                 |
| (A) elicitor type   | 1.911645       | 2   | 0.955822    | 52.5979 | <b>0.000000</b> |
| (B) concentration   | 1.746994       | 4   | 0.436748    | 24.0338 | <b>0.000000</b> |
| A x B               | 0.912565       | 8   | 0.114071    | 6.2772  | <b>0.000009</b> |
| Error               | 0.999474       | 55  | 0.018172    |         |                 |
| <b>bellidifolin</b> |                |     |             |         |                 |
| (A) elicitor type   | 4.31979        | 2   | 2.15990     | 56.7827 | <b>0.000000</b> |
| (B) concentration   | 3.09040        | 4   | 0.77260     | 20.3113 | <b>0.000000</b> |
| A x B               | 2.42421        | 8   | 0.30303     | 7.9664  | <b>0.000001</b> |
| Error               | 2.05405        | 54  | 0.03804     |         |                 |
