# Supplementary material for: Gentianella lutescens subsp. carpatica J. Holub.: Shoot Propagation In Vitro and Effect of Sucrose and Elicitors on Xanthones Production
Source: MDPI journal article supplement (doi:10.3390/plants10081651), 2021-08-11
Supplement: s1 [file s1]

**Table S2.** The results of two-way ANOVA for the influence of carbohydrate type (sucrose or sorbitol) and their concentrations on in vitro growth and flowering of shoots of *G. lutescens*. The bold values indicate statistically significant differences ( $p \leq 0.05$ ).

| Source                  | Sum of Squares | df | Mean Square | F-Ratio  | p-Value         |
|-------------------------|----------------|----|-------------|----------|-----------------|
| <b>Fresh weight, mg</b> |                |    |             |          |                 |
| (A) carbohydrate type   | 3074           | 1  | 3074        | 0.102    | 0.750739        |
| (B) concentration       | 7471486        | 4  | 1867872     | 61.730   | <b>0.000000</b> |
| A x B                   | 359189         | 4  | 89797       | 2.968    | <b>0.024209</b> |
| Error                   | 2481220        | 82 | 30259       |          |                 |
| <b>Dry weight, mg</b>   |                |    |             |          |                 |
| (A) carbohydrate type   | 31             | 1  | 31          | 0.023    | 0.878964        |
| (B) concentration       | 15695          | 4  | 3924        | 2.994    | <b>0.023273</b> |
| A x B                   | 5327           | 4  | 1332        | 1.016    | 0.403927        |
| Error                   |                |    |             |          |                 |
| <b>Growth index</b>     |                |    |             |          |                 |
| (A) carbohydrate type   | 0.1364         | 1  | 0.1364      | 0.687    | 0.409736        |
| (B) concentration       | 49.3714        | 4  | 12.3429     | 62.145   | <b>0.000000</b> |
| A x B                   | 1.7203         | 4  | 0.4301      | 2.165    | 0.080115        |
| Error                   | 16.2864        | 82 | 0.1986      |          |                 |
| <b>Dry matter, %</b>    |                |    |             |          |                 |
| (A) carbohydrate type   | 16.19          | 1  | 16.19       | 7.10     | <b>0.009299</b> |
| (B) concentration       | 1998.38        | 4  | 499.60      | 219.03   | <b>0.000000</b> |
| A x B                   | 64.24          | 4  | 16.06       | 7.04     | <b>0.000063</b> |
| Error                   | 187.04         | 82 | 2.28        |          |                 |
| <b>Flowering</b>        |                |    |             |          |                 |
| (A) carbohydrate type   | 17.60000       | 1  | 17.60000    | 35.37255 | <b>0.000000</b> |
| (B) concentration       | 7.74417        | 4  | 1.93604     | 3.89107  | <b>0.006065</b> |
| A x B                   | 7.74417        | 4  | 1.93604     | 3.89107  | <b>0.006065</b> |
| Error                   |                |    |             |          |                 |
